# Supplementary material for: Photo-Fenton Degradation of Methyl Orange with Dunino Halloysite as a Source of Iron
Source: MDPI journal article supplement (doi:10.3390/catal12030257), 2022-02-26
Supplement: s1 [file s1]

# Photo-Fenton Degradation of Methyl Orange with Dunino Halloysite as a Source of Iron

Simona Filice<sup>1,\*</sup>, Corrado Bongiorno<sup>1</sup>, Sebania Libertino<sup>1</sup>, Leon Gradon<sup>2</sup>, Daniela Iannazzo<sup>3</sup> and Silvia Scalese<sup>1,\*</sup>

<sup>1</sup>Istituto per la Microelettronica e Microsistemi, Consiglio Nazionale delle Ricerche (CNR-IMM), Ottava Strada n.5, I-95121 Catania, Italy; simona.filice@cnr.imm.it, corrado.bongiorno@imm.cnr.it, sebania.libertino@imm.cnr.it, silvia.scalese@imm.cnr.it

<sup>2</sup>Faculty of Chemical and Process Engineering, Warsaw University of Technology, ul. Warynskiego 1, 00-645 Warsaw, Poland; Leon.Gradon@pw.edu.pl

<sup>3</sup> Dipartimento di Ingegneria, Università degli Studi di Messina, Contrada di Dio, I-98166, Messina, Italy; daniela.iannazzo@unime.it

\*Correspondence: simona.filice@imm.cnr.it; silvia.scalese@imm.cnr.it

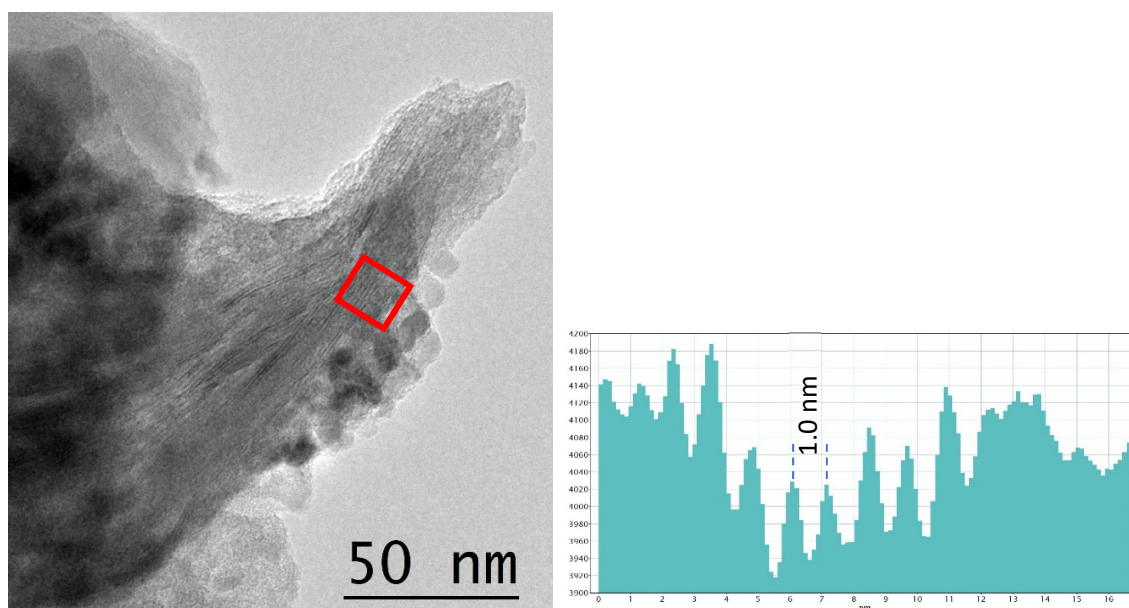

Figure S1: HR-TEM image of HT(H<sup>+</sup>) sample and its line profile from the region defined by the red box. The (001) basal spacing measured by the line profile is 1.0 nm.

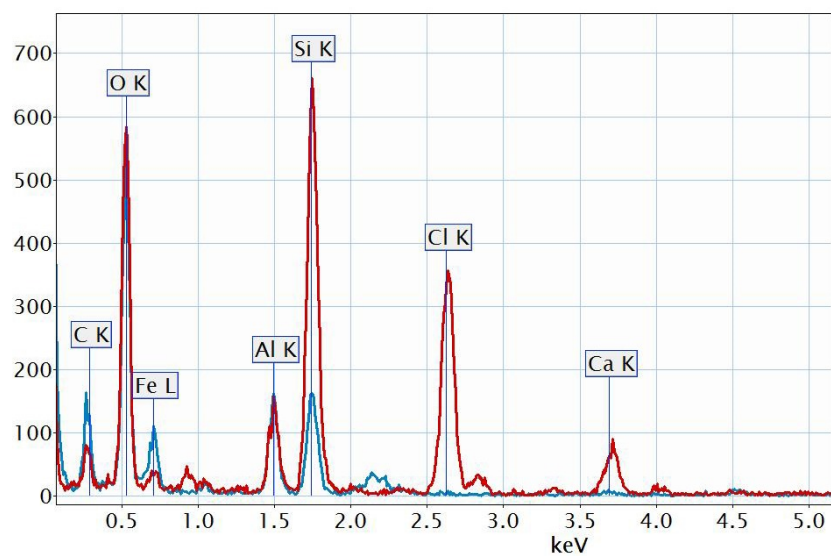

Figure S2: EDX spectra acquired on initial (blue curve) and treated (red curve) samples during TEM acquisition. The spectra are normalized with respect to the peak of oxygen.

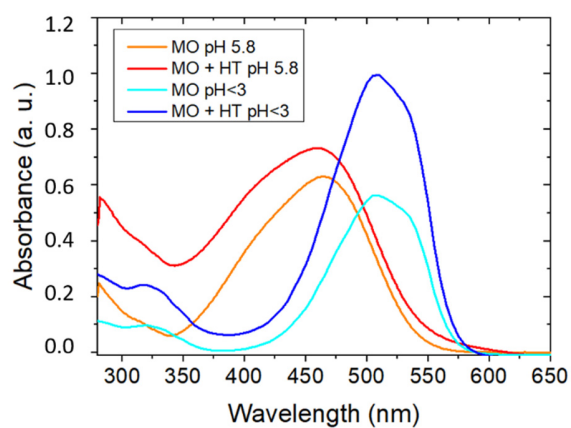

Figure S3: UV-Visible spectra of MO solutions and HT/MO solutions both at neutral and acid pH.

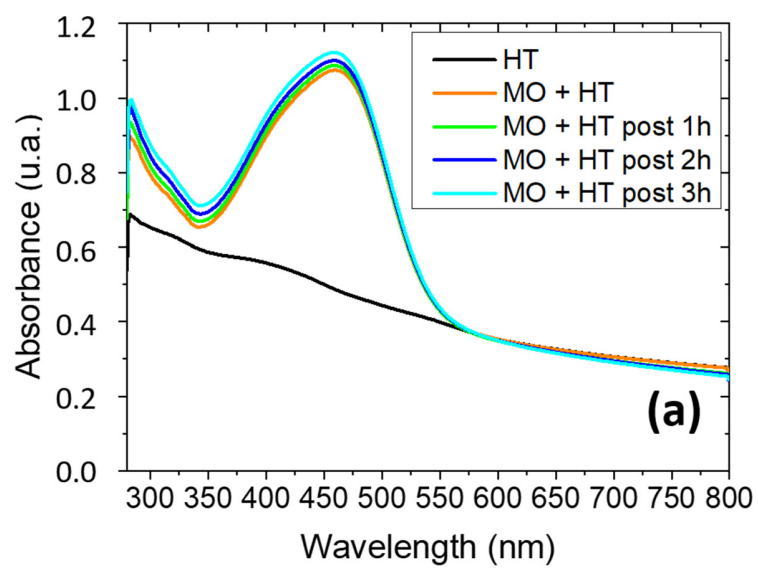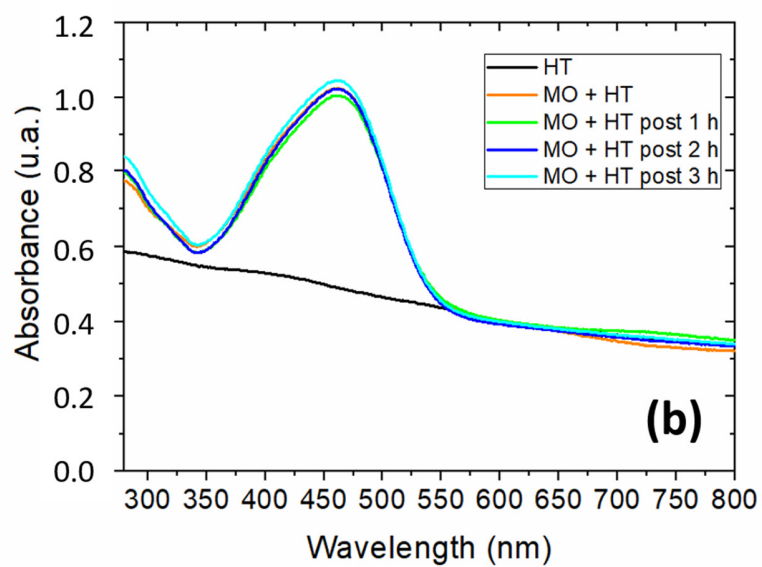

Figure S4: UV-Visible spectra of raw HT sample after adding MO at pH=5.8 in dark (a) and under UV-Visible light irradiation (b).

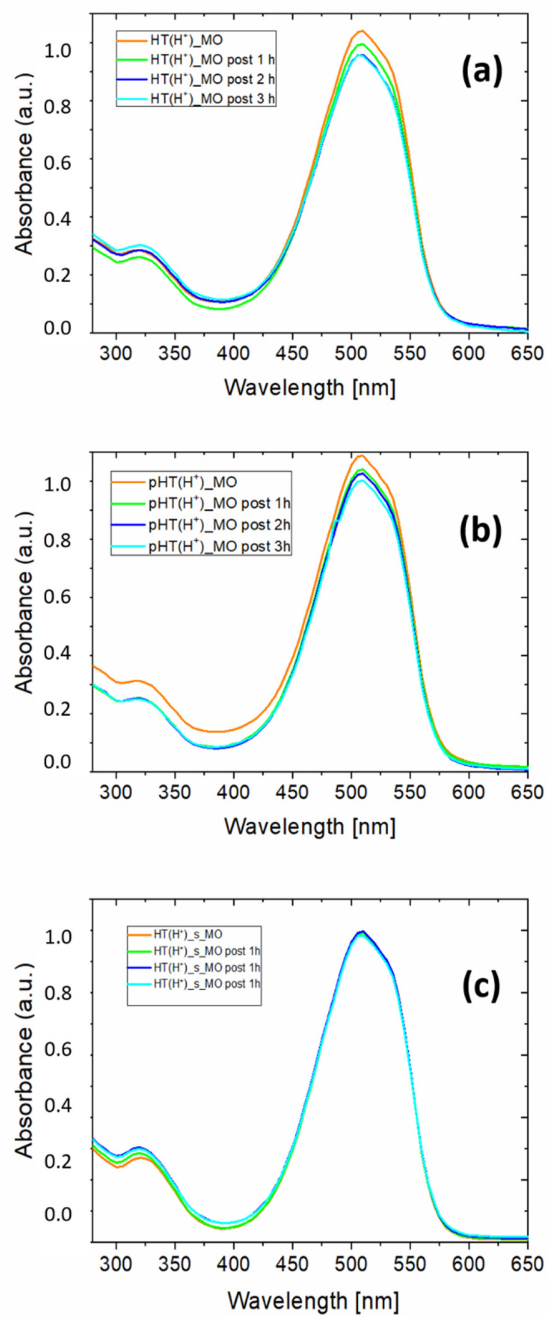

Figure S5: UV-Visible spectra of (a) HT(H<sup>+</sup>), (b) p HT(H<sup>+</sup>) and (c) sHT(H<sup>+</sup>) after adding MO in dark.

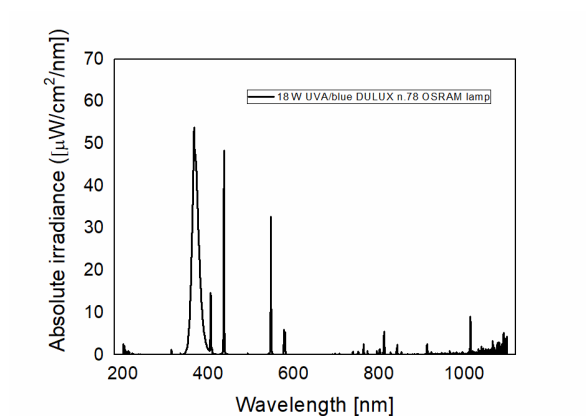

Figure S6: The emission spectra of an 18 W UVA/blue DULUX n.78 OSRAM lamp.
