# Supplementary material for: Photo-Fenton Degradation of Methyl Orange with Dunino Halloysite as a Source of Iron
Source: MDPI journal article supplement (doi:10.3390/catal12030257), 2022-02-26
Supplement: s1 [file s1]

Archive with 1 entries (1 files):
- catalysts-1576866-supplementary.pdf
